# Supplementary material for: Liver-Specific Transcriptional Modules Identified by Genome-Wide In Silico Analysis Enable Efficient Gene Therapy in Mice and Non-Human Primates
Source: PubMed Central journal article supplement — Mol Ther. 2014 Aug 5;22(9):1605–13. doi: 10.1038/mt.2014.114 (PMC4435486; doi:10.1038/mt.2014.114), 2014-08-05
Supplement: mt2014114x6.pdf [file mt2014114x6.pdf]

**SUPPLEMENTARY TABLE 1**

| CRM      | Gene                  | Length (bp) | Sequences                                                                                                                                                                                                                                                                                                                                                                                                                                                                                                                                                                                           |
|----------|-----------------------|-------------|-----------------------------------------------------------------------------------------------------------------------------------------------------------------------------------------------------------------------------------------------------------------------------------------------------------------------------------------------------------------------------------------------------------------------------------------------------------------------------------------------------------------------------------------------------------------------------------------------------|
| HS-CRM1  | Alb                   | 101         | CAGCCAATGAAATACAAAGATGAGTCTAGTTAATAATCTACAATTATTGGTTA<br>AAGAAGTATATTAGTGCTAATTTCCCTCCGTTTGTCTAGCTTTTCTC                                                                                                                                                                                                                                                                                                                                                                                                                                                                                            |
| HS-CRM2  | Apoc4                 | 71          | TGAATGACCTTCAGCCTGTTCCCGTCCCTGATATGGGCAAACATTGCAAG<br>CAGCAAACAGCAAACACATAG                                                                                                                                                                                                                                                                                                                                                                                                                                                                                                                         |
| HS-CRM3  | Apoh <sup>a</sup>     | 173         | GGCGTATTCTTAAGAATAGATTAAATAATCATAAAAAGATCTATACTTAAAAAT<br>TGAAAAATGCTTAAATATTAATAATCTTCTCATAAAAAATACTAATTTAAAAA<br>TGAGCCTGAAATGTTTATCTATTTATTGCACAGGGTTGCATACATAAAACGA<br>CACACCCTCTGT                                                                                                                                                                                                                                                                                                                                                                                                             |
| HS-CRM4  | Apoh <sup>b</sup>     | 551         | AGTTTGGAACAAGACTATATACCATATCCTACAGGAAGAATAAAAGTAAAGG<br>AAAGGTGCCATCTCTACTGAATAGAGAGTCTTAACAAAAGGCTTCAAAG<br>GACTCTGCATCTTTAATAATATAAAAAGGCTAGGACACAAAACAGCATCATCT<br>AAAATGCCATTAGAAATACTTACATACAAAAAGGCTAAGTAAAGCAGGAT<br>TTTATAAAGTGATCAAAAAGAACACTAAGGGGGAAAAATCTTTTAAGATT<br>AAAGAGGTTTTTCAAAGGACAAGTTGAAGTGGCTGTAATAATTTATGAGGCA<br>GCATTAACCTTCAGTTCTAAGTAACAATAAATTTACCATAAAAAACATACA<br>TGTGTCAATATTATAAGCCTCTAAACTTTTTAAAACAATTTCTGCAGAAC<br>TGATTAGATATTAAGTCAAGATTAGCAGATACTAACTTTTTTCATTAGCATA<br>CTATGATCACTCAGAGTAAAGGAGGAAATTTAGAAAAGAAAATAGACAGAA<br>CCATCAATAGTCGATTACCACCAATGTGA |
| HS-CRM5  | Cyp2e1                | 141         | TGCGGGAATCAGCCTTTGAAACGATGGCCAACAGCAGCTAATAATAAACCC<br>AGTAATTTGGGATAGACGAGTAGCAAGAGGGCATTGGTTGGTGGGTCACC<br>CTCCTTCTCAGAACACATTATAAAAACTTCCGTTTCCACA                                                                                                                                                                                                                                                                                                                                                                                                                                               |
| HS-CRM6  | Aldob                 | 135         | GCATGATTTTAAGGACTGGTTGTTTATGAGCCAATCAGAGGTGTTGAATAA<br>ACACCTCCCTACTAGGTCAAGGTAGAAAGGGGAGGGCAATATTGGAAAA<br>AAAAAATCATGATGAGAAGTCTATAAAAAATTGTGT                                                                                                                                                                                                                                                                                                                                                                                                                                                    |
| HS-CRM7  | Apoc1                 | 94          | CTAAAATGGGCAAAACATTGCAAGCAGCAAACAGCAAACACACAGCCCTCC<br>CTGCTGCTGACCTTGGAGCTGGGGCAGAGGTCAGAGACCTCTC                                                                                                                                                                                                                                                                                                                                                                                                                                                                                                  |
| HS-CRM8  | Serpina1 <sup>a</sup> | 72          | GGGGGAGGCTGCTGGTGAATATTAACCAAGGTCACCCAGTTATCGGAG<br>GAGCAAACAGGGGCTAAGTCCAC                                                                                                                                                                                                                                                                                                                                                                                                                                                                                                                         |
| HS-CRM9  | Tf                    | 171         | AGGAGGAACTGCTCAAACAGACAGAGGCTCTTTGTTTGCTTTGCTTCTG<br>TGCAACTGGGCAACATTTGGAACAACAATAATTTGGTTTCAGAGGCCAC<br>TGCTTTCTTACCCACCTCCTGCTGGTCAGCTTTTCCAGCTTTCCTGCAGC<br>TACACACAAGCGCAGCTATT                                                                                                                                                                                                                                                                                                                                                                                                                |
| HS-CRM10 | Ttr                   | 170         | CGATGCTCTAATCTCTCTAGACAAGGTTTCATATTTGTATGGGTTACTTATTC<br>TCTCTTTGTTGACTAAGTCAATAATCAGAATCAGCAGGTTTGCAGTCAGAT<br>TGGCAGGGATAAGCAGCCTAGCTCAGGAGAAGTGAGTATAAAGCCCCA<br>GGCTGGGAGCAGCCATCA                                                                                                                                                                                                                                                                                                                                                                                                              |
| HS-CRM11 | Fga                   | 74          | TGCCACTCTAGTCCCATCTATTTAATCTGCAAGAGGTTTGGTTAATC<br>ATTGGCTTTGTCTGTAGACA                                                                                                                                                                                                                                                                                                                                                                                                                                                                                                                             |
| HS-CRM12 | Hpr                   | 441         | TTCTTCCCCCTTCCAAGACCCCTGAATCCTATCAAAGCACATCTTCC<br>ATTCATTGCTTCCCGGTGTCATTATGACAAGCGGCTACAAATCAATAGCAG<br>AGGGAAAGGCAGGACCAACCCGCACTCACCAGTGATAAAGATTCACTC<br>TCAGCCCCGATTTGCTAATAGCCATAATAGCAGCCATTGGCCGCCCGCA<br>TTAAATAATACATTTCACTCCGCTTTATTATGGGATTTTTAAAACCTCTCAC<br>CAATTTGGATTTTCTCGATGGTCTCTAATTTCCACATTTATCATTTAAATTA<br>AACTGCTCTGTGAAAGGGGGATAGAGAAGAAGGTTAGAGAGAGG<br>CCAGACAGTACTGTATTTTCTTTTACTCCCCCTTTATGAAAACCCATA<br>AATAATATCAGGTATCACAGCTATAAGCAGCAGG                                                                                                                           |
| HS-CRM13 | Serpina1 <sup>b</sup> | 88          | GGAGTTGCTGGTGCTTCCCAGGCTGGAGATTGAGTTAATATTACAGGC<br>CAAAGGCGATGTGGGCTTGTGCAATCATAGGCCCGGCC                                                                                                                                                                                                                                                                                                                                                                                                                                                                                                          |
| HS-CRM14 | Serpina1 <sup>c</sup> | 41          | ATCGCCAGGTCACCTGAGGAGTTAATGAATACATATCTCCT                                                                                                                                                                                                                                                                                                                                                                                                                                                                                                                                                           |
