# Supplementary figures and images for: Liver-Specific Transcriptional Modules Identified by Genome-Wide In Silico Analysis Enable Efficient Gene Therapy in Mice and Non-Human Primates
Source: PubMed Central journal article supplement — Mol Ther. 2014 Aug 5;22(9):1605–13. doi: 10.1038/mt.2014.114 (PMC4435486; doi:10.1038/mt.2014.114), 2014-08-05

# Supplementary Figure 2

a

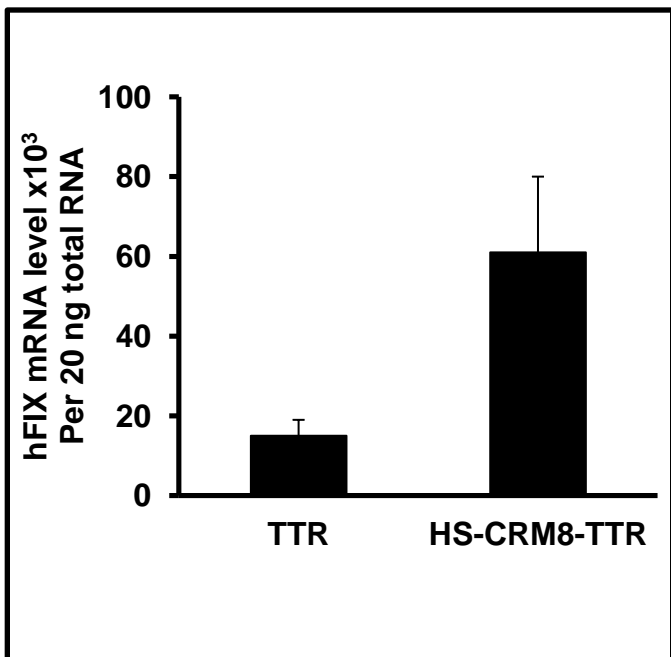

b

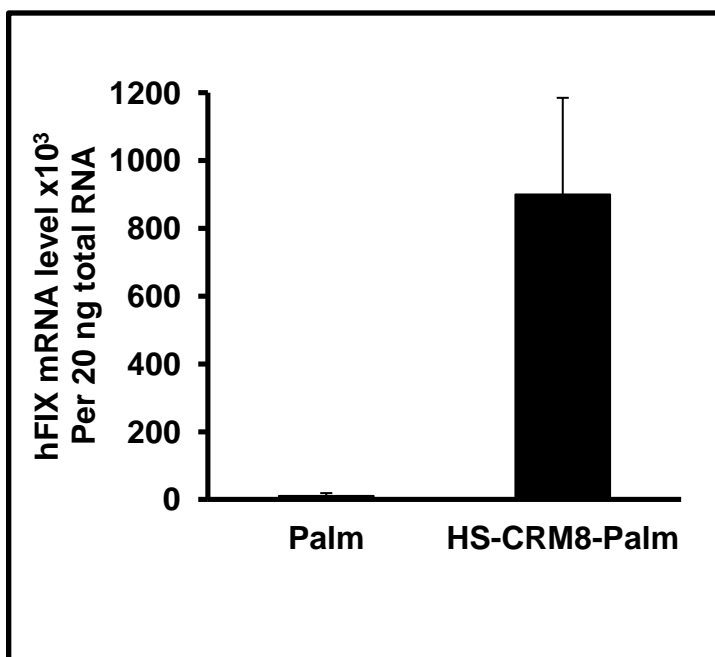

c

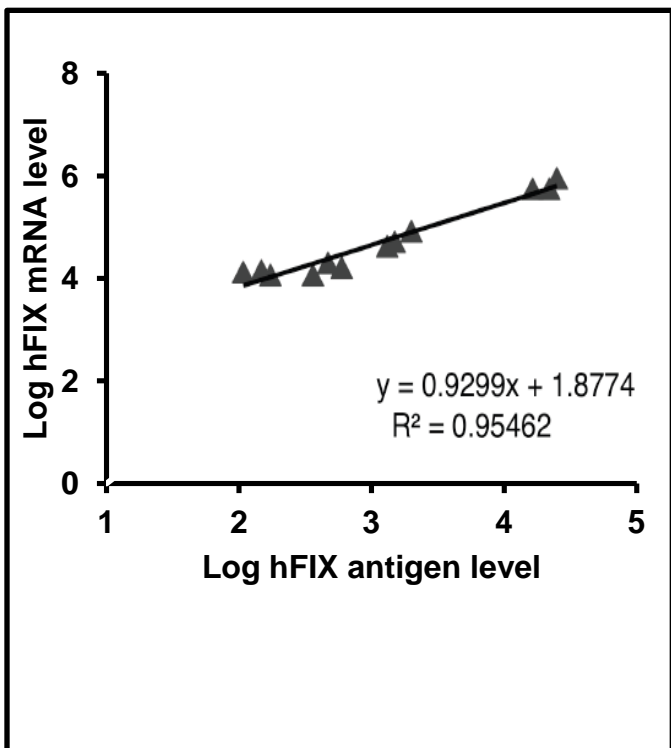

d

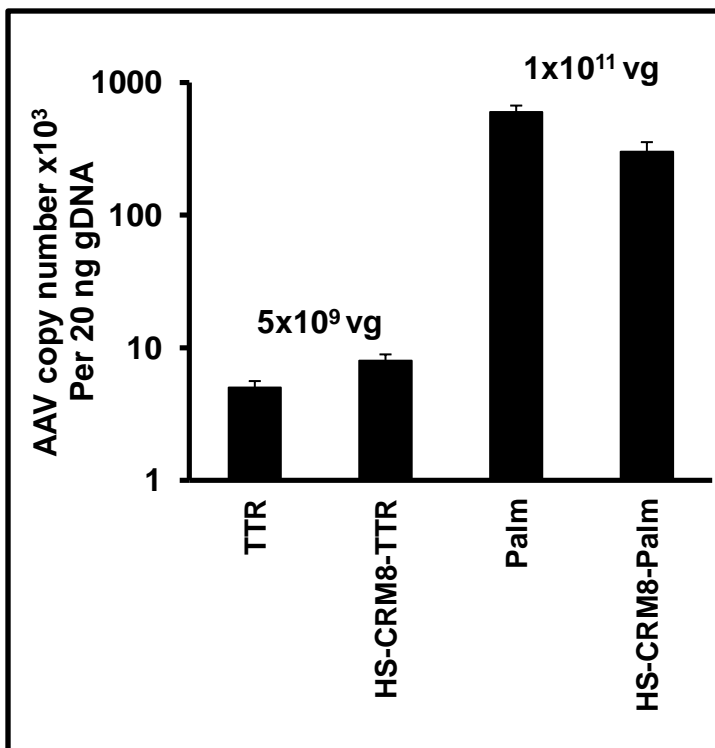

Supplement: mt2014114x2.pdf [file mt2014114x2.pdf]

# Supplementary Figure 3: Coagulation parameters

a

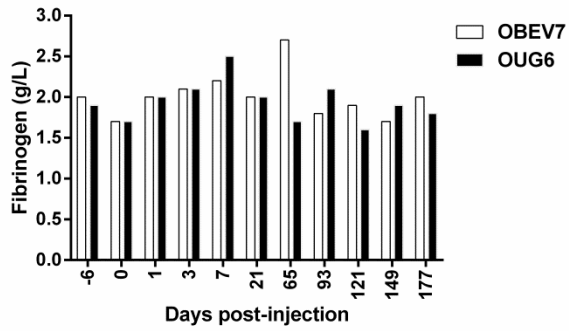

b

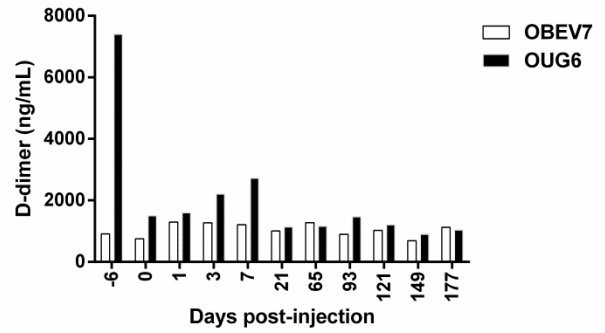

c

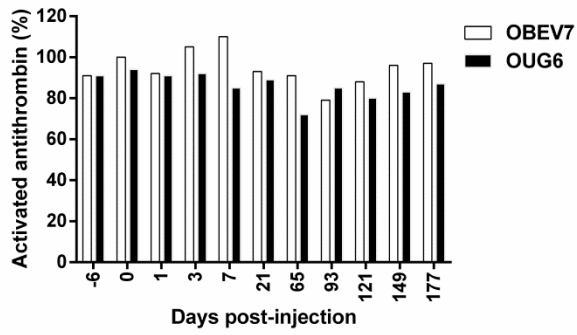

Supplement: mt2014114x3.pdf [file mt2014114x3.pdf]

# Supplementary Figure 4: Hematological parameters

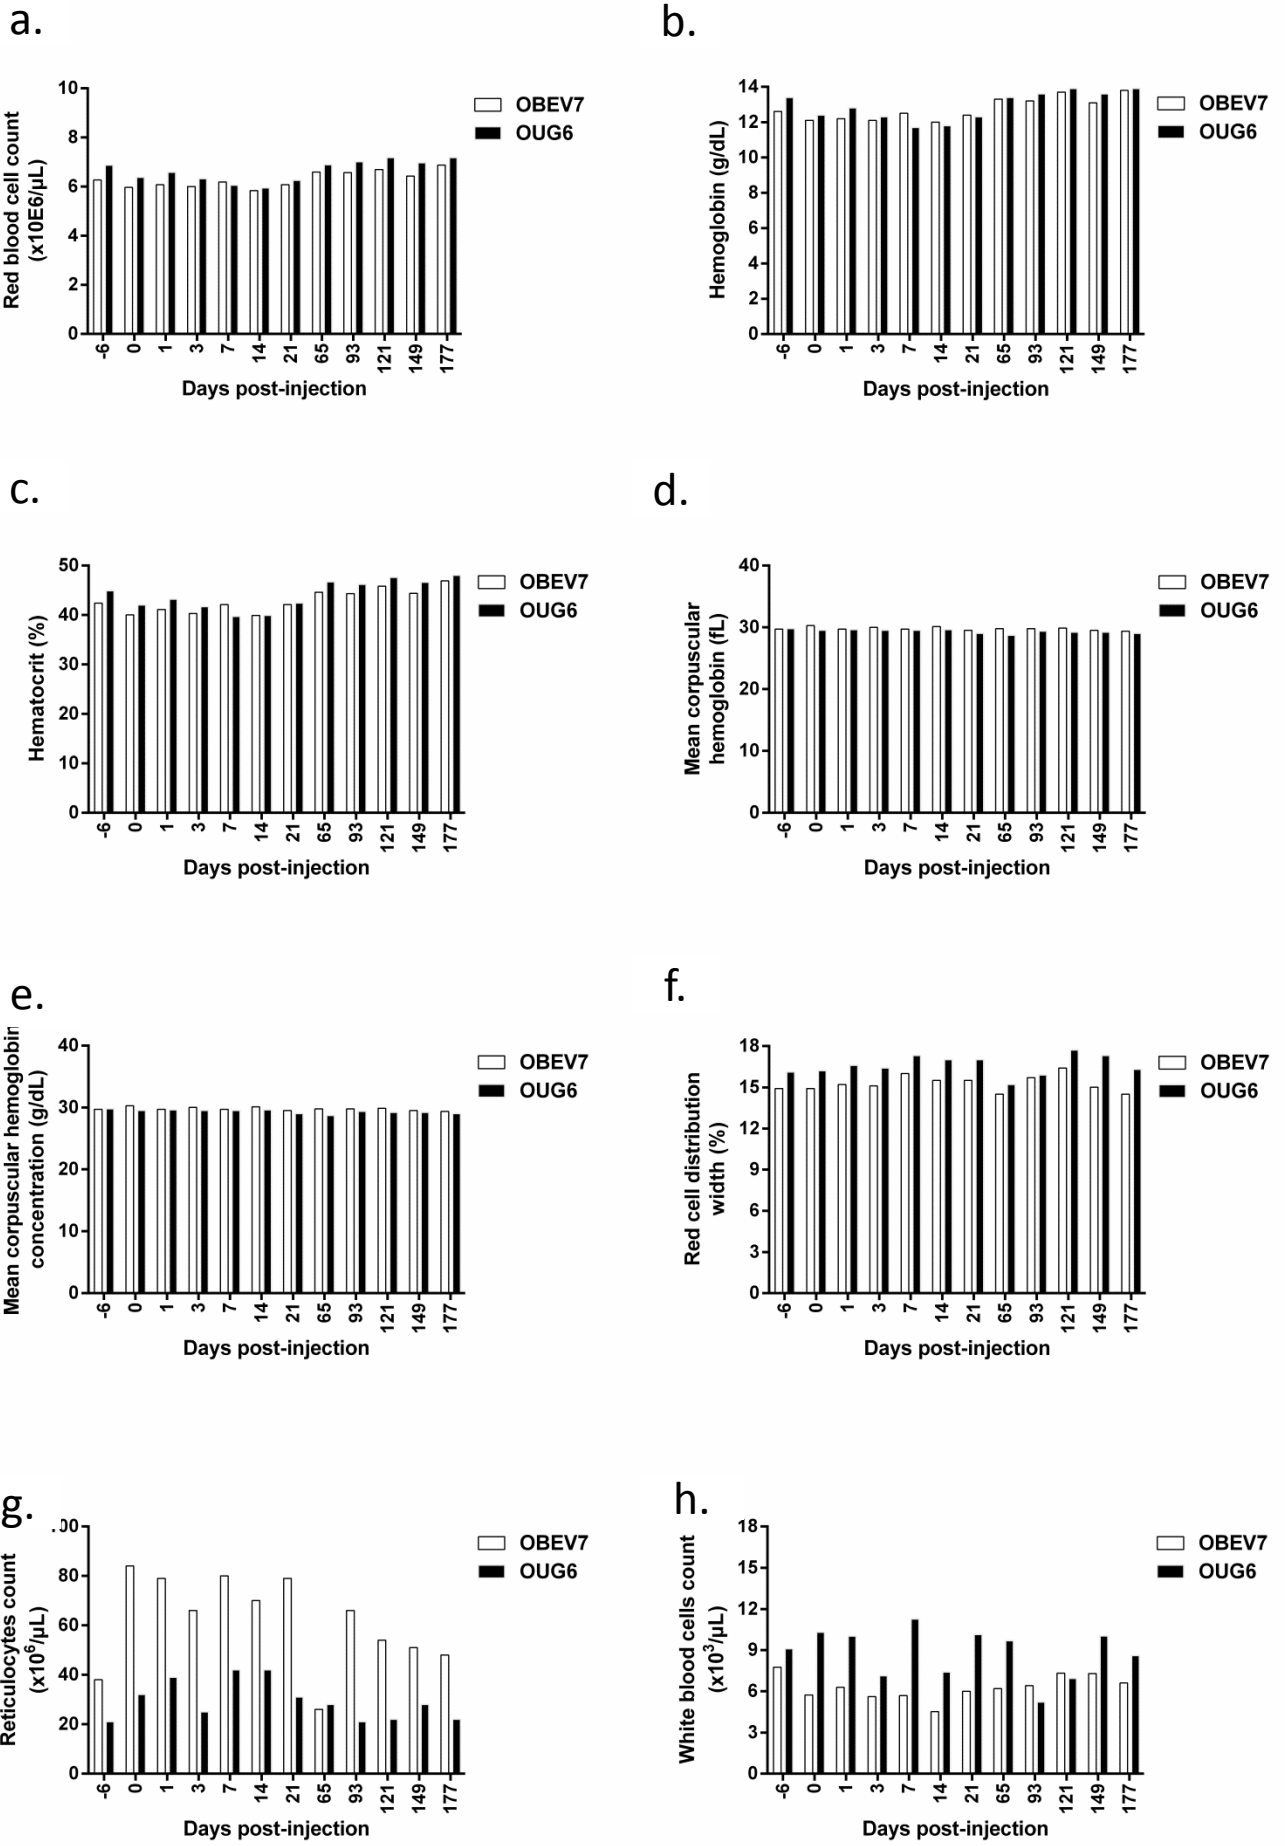

i.

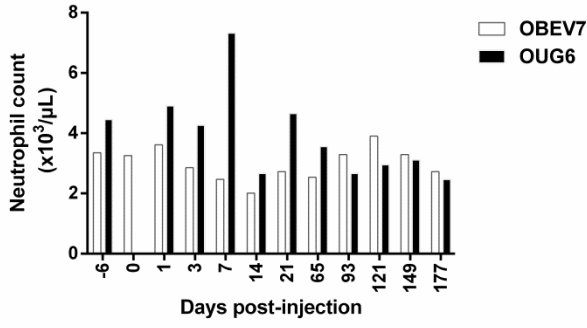

j.

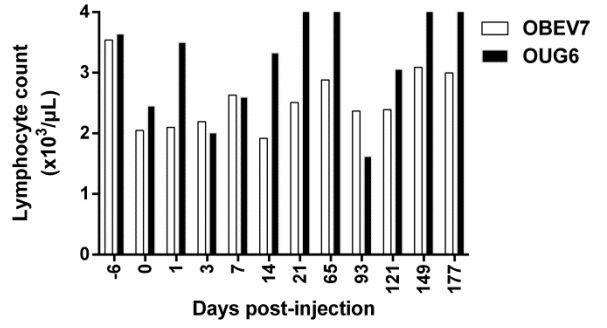

k.

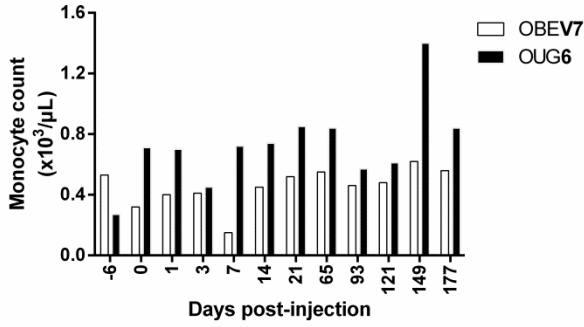

l.

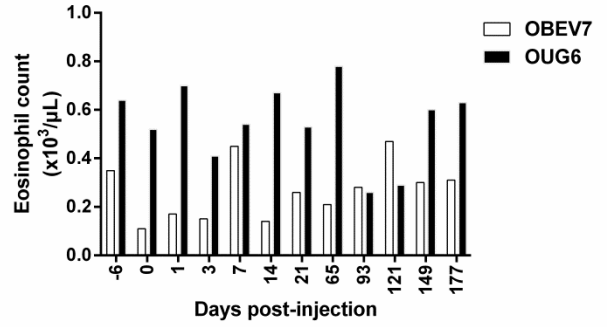

Supplement: mt2014114x4.pdf [file mt2014114x4.pdf]

# Supplementary Figure 5. Chemical Parameters

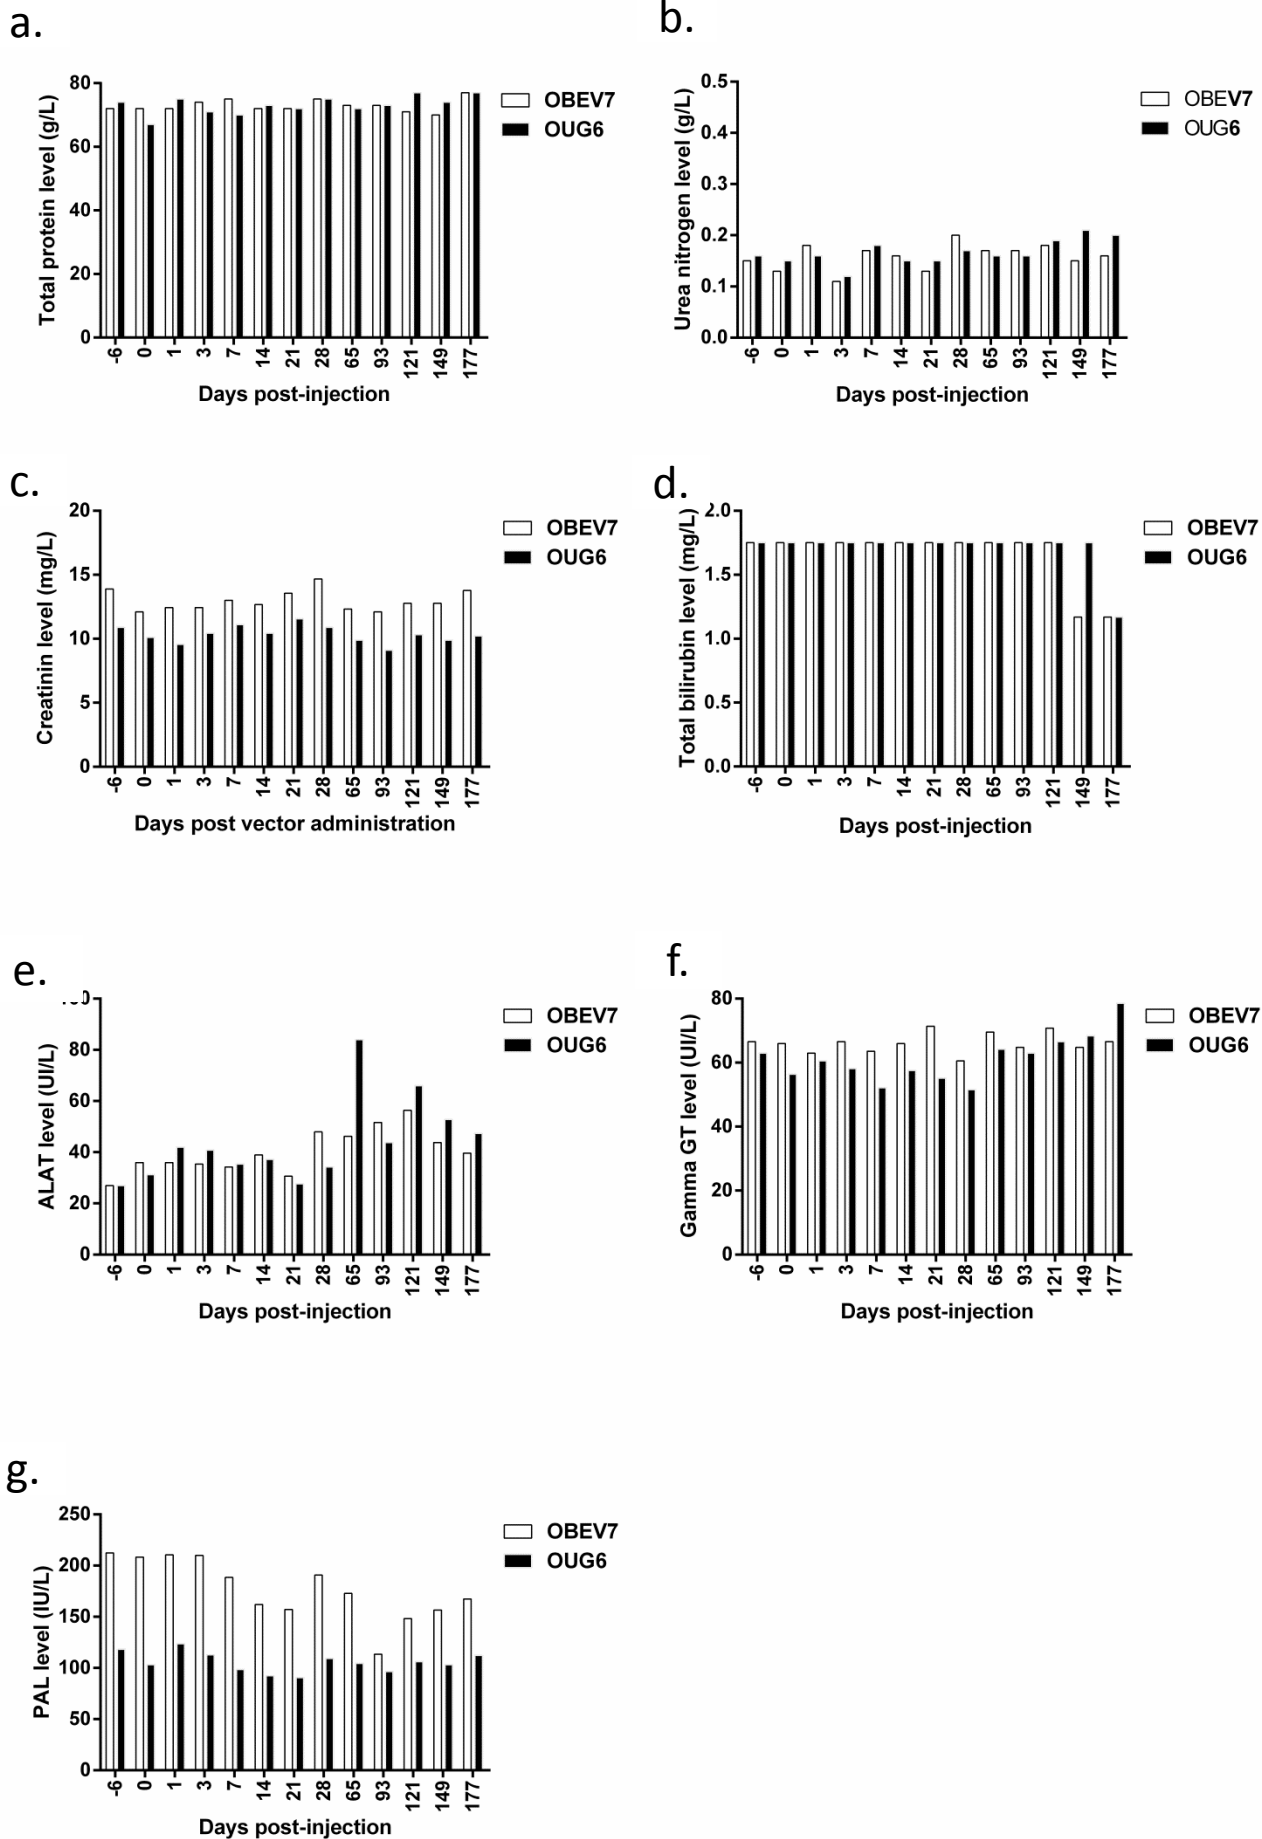

Supplement: mt2014114x5.pdf [file mt2014114x5.pdf]
